# Supplementary material for: The Cochaperone Shutdown Defines a Group of Biogenesis Factors Essential for All piRNA Populations in Drosophila
Source: PubMed Central journal article supplement — Mol Cell. 2012 Sep 28;47(6):954–69. doi: 10.1016/j.molcel.2012.07.021 (PMC3463805; doi:10.1016/j.molcel.2012.07.021), 2012-09-28
Supplement: mmc1.pdf [file mmc1.pdf]

**The Cochaperone Shutdown Defines  
a Group of Biogenesis Factors Essential  
for All piRNA Populations in *Drosophila***

Daniel Olivieri, Kirsten-André Senti, Sailakshmi Subramanian, Ravi Sachidanandam  
and Julius Brennecke

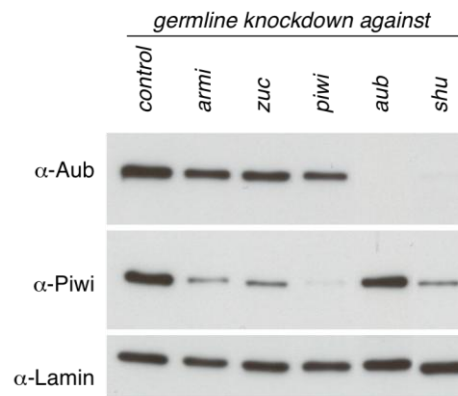

**Figure S1.**

Western blot analysis indicating protein levels of the PIWI members Piwi and Aub upon knockdown of the indicated genes. Lamin levels are shown for normalization purposes. While Aub levels were essentially undetectable in the *aub*-GLKD ovary lysate, low levels of Piwi were still observed in *piwi*-GLKD ovary lysate. This most likely reflects Piwi from somatic follicle cells that are unaffected by the GLKD.

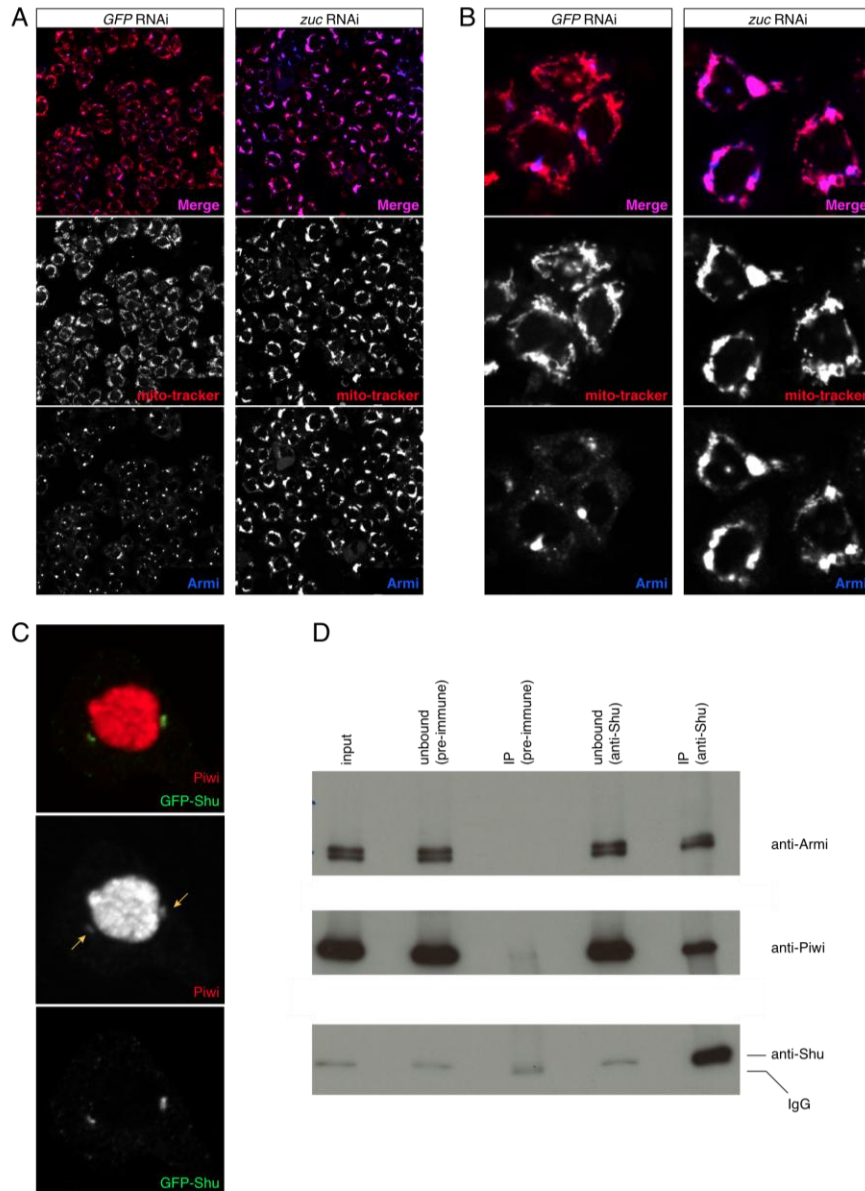

### Figure S2.

(A) Shown are immuno fluorescence stainings of OSCs treated with GFP siRNAs (left) or *zuc* siRNAs (right). Mitochondria were visualized with Mito-tracker (red) and Yb-bodies with anti-Armi stainings (blue). In the merge image (top row), overlap of red and blue signal appears magenta. This illustrates the nearly complete co-localization of Armi and mitochondria in *zuc* knockdowns.

(B) Zoom in of an area shown in part (A).

(C) Immuno-fluorescence analysis of OSCs transfected with GFP-Shutdown (green) stained for Piwi (red). Yellow arrows indicate the faint but clearly visible accumulation of Piwi in peri-nuclear bodies that also accumulate Shu and represent therefore Yb-bodies.

(D) Western analysis of an anti-Shu IP experiment in comparison to a control IP experiment with pre-immune serum. Endogenous Armi and Piwi proteins are specifically co-purified with Shu from OSC lysate. The lower running and cross-reacting band in the Shu blot is likely IgG heavy chain, low levels of which are still present in the IP fraction despite the antibody being chemically cross-linked to the beads.



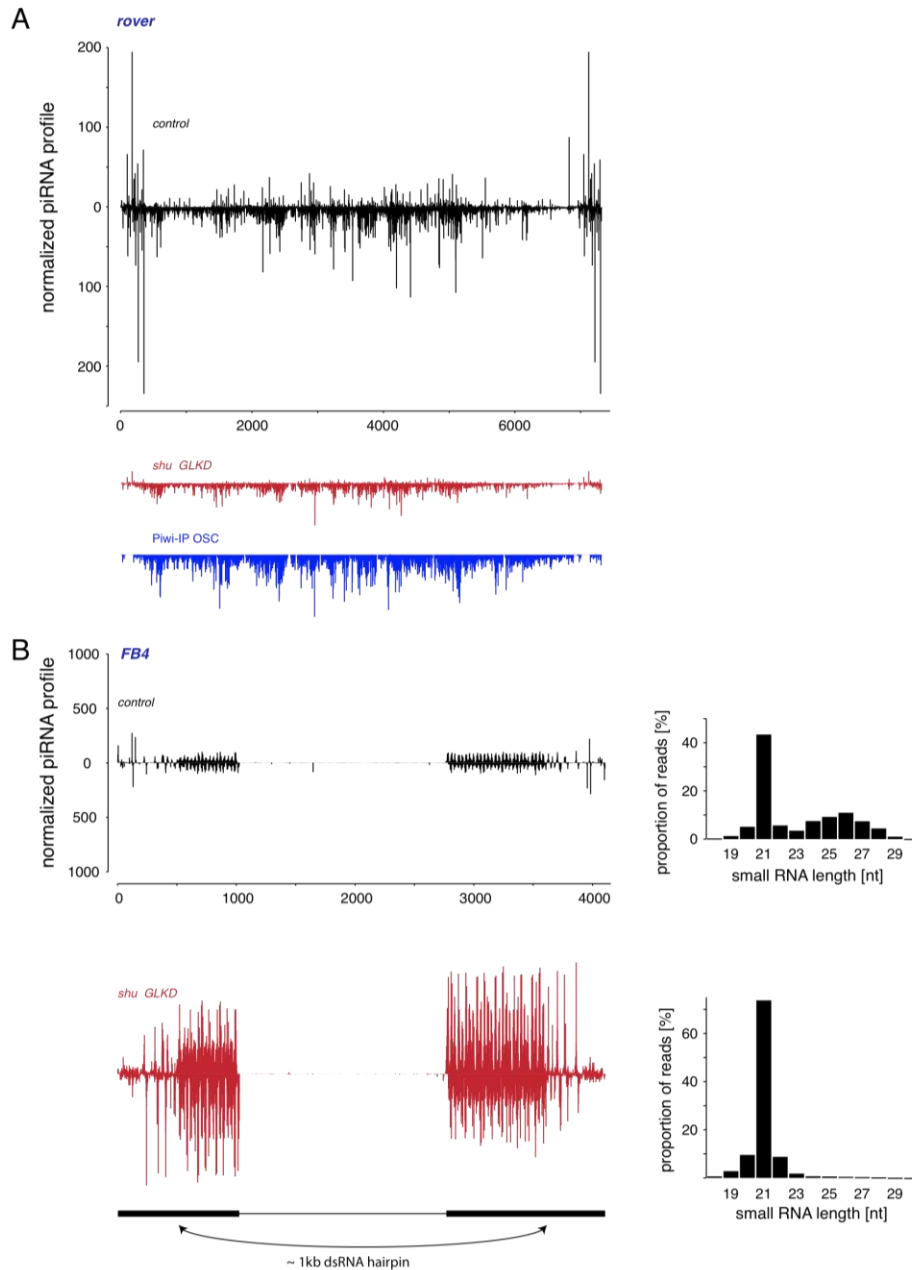

**Figure S4.**

(A) Shown are normalized piRNA profiles (23-30nt) mapping to the annotated “germline dominant” element *rover* in control GLKD (black) and *shu*-GLKD (red) libraries. Below, the piRNA profile from an OSC Piwi-IP library is shown, indicating that *rover* is a prototypical intermediate element.

(B) Shown are small RNA profiles (18-30nt) mapping to the DNA element *FB4* in control GLKD (black) and *shu*-GLKD (red) libraries. To the right, the length profiles of the corresponding small RNA populations are shown, indicating a complete shift to siRNAs in the *shu*-GLKD library. The cartoon below indicates the sequence stretches that are capable of folding into an extended dsRNA hairpin. For *shu*-GLKD we used the NGT > Dicer2 system and expressed the *shu* VDRC line (expression of an shRNA line resulted in distorted ovarian morphology); it is possible that the over-expression of Dicer2 contributes to the strong increase in siRNAs.

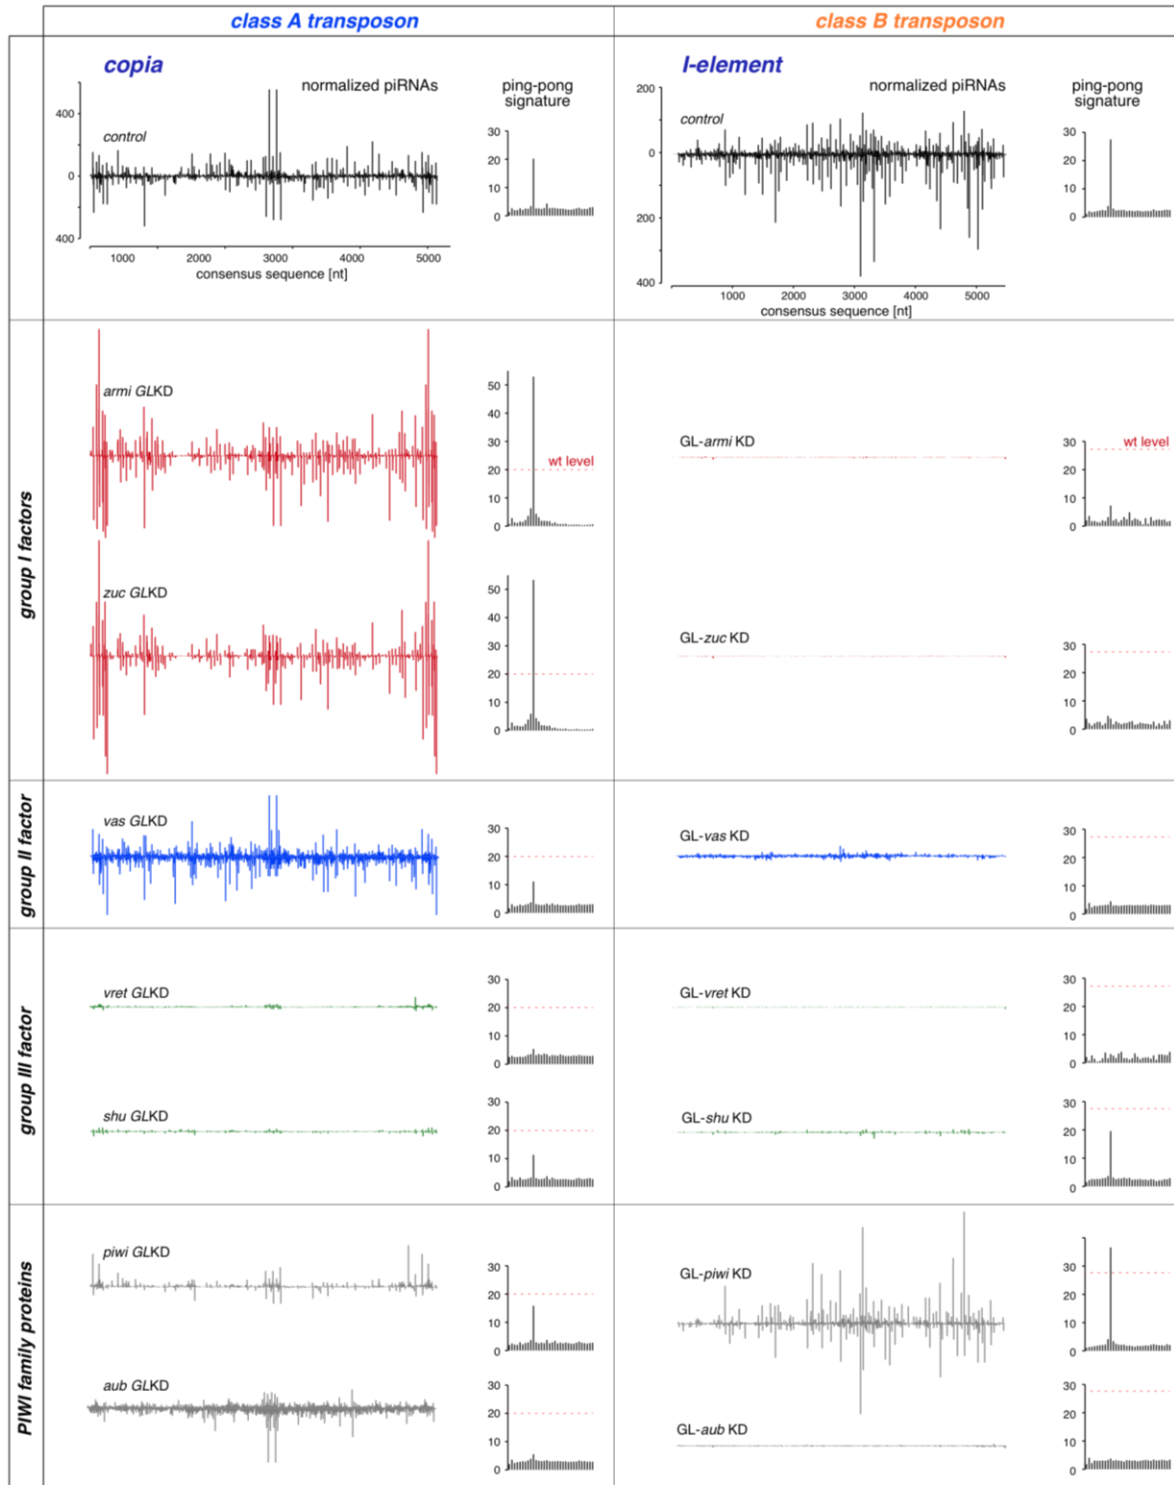

**Figure S5.**

Shown are normalized piRNA profiles mapping to the class A element *copia* (left column) and the class B element *I-element* (right column) in control-GLKD (top) and all other analyzed GLKD libraries that are classified into the biogenesis groups I-III. Also shown are the ping-pong signatures for each element in each library with the levels obtained from the control-GLKD library indicated with a red dashed line.

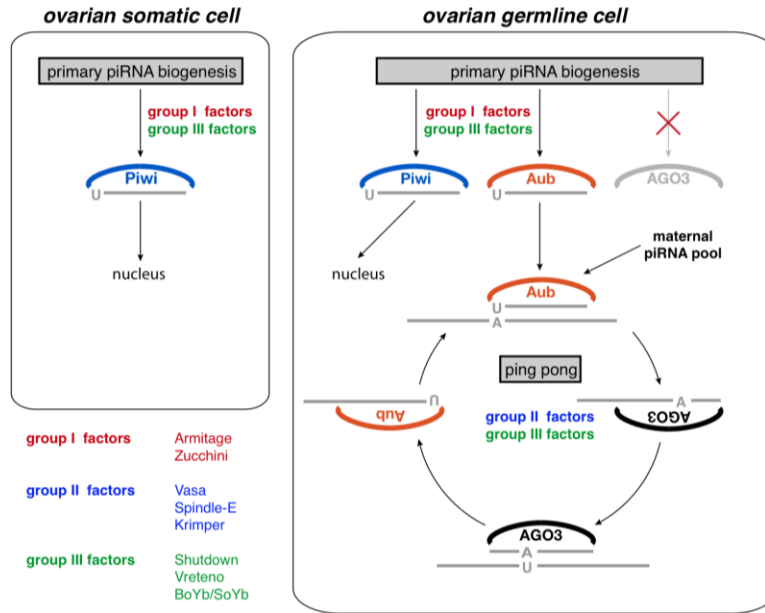

**Figure S6.**

Model of primary and secondary (ping-pong) piRNA biogenesis in *Drosophila*. Depicted are a somatic and a germline cell from the *Drosophila* ovary. The involvement of group I-III biogenesis factors as well as their identity is indicated.

**Table S4 (used fly stocks)**

|                                                                                                                                                                                                                                                                                                                                                                |
|----------------------------------------------------------------------------------------------------------------------------------------------------------------------------------------------------------------------------------------------------------------------------------------------------------------------------------------------------------------|
| <i>shu</i> <sup>1</sup> /CyO (WQ41) and <i>shu</i> <sup>2</sup> /CyO (WM40) (Schupbach and Wieschaus, 1991)                                                                                                                                                                                                                                                    |
| Df(2R)BSC665/SM6a (Bloom. # 26517);                                                                                                                                                                                                                                                                                                                            |
| <i>tj</i> -GAL4 (DGRC # 104055);                                                                                                                                                                                                                                                                                                                               |
| UAS- <i>Dcr-2</i> ; NGT (Bloom. # 25751);                                                                                                                                                                                                                                                                                                                      |
| P{GAL4::VP16- <i>nos</i> .UTR}CG6325 <sup>MVD1</sup> (Bloom. # 4937);                                                                                                                                                                                                                                                                                          |
| MTD-GAL4 (Ni et al., 2011);                                                                                                                                                                                                                                                                                                                                    |
| <i>w</i> <sup>1118</sup> (Bloom. # 3605);                                                                                                                                                                                                                                                                                                                      |
| <i>armi</i> shRNA, <i>vret</i> shRNA, <i>SoYb</i> shRNA, <i>BoYb</i> shRNA, <i>spn-E</i> shRNA (Handler et al., 2011);                                                                                                                                                                                                                                         |
| <i>piwi</i> shRNA, <i>aub</i> shRNA (Ni et al., 2011);                                                                                                                                                                                                                                                                                                         |
| <i>armi</i> RNAi (VDRC # 16205);                                                                                                                                                                                                                                                                                                                               |
| <i>zuc</i> shRNA (TRiP # GL00111);                                                                                                                                                                                                                                                                                                                             |
| <i>shu</i> RNAi (VDRC # 105832);                                                                                                                                                                                                                                                                                                                               |
| <i>shu</i> shRNA (TRiP # GL00379);                                                                                                                                                                                                                                                                                                                             |
| <i>vas</i> , <i>krimp</i> and <i>AGO3</i> shRNAs (sequences in Table S1) were integrated into attP2.                                                                                                                                                                                                                                                           |
| eGFP_ <i>Shu</i> , eGFP_ <i>Aub</i> , and eGFP_ <i>Hsp83</i> were cloned by inserting N-terminal eGFP via bacterial recombineering into genomic rescue constructs and integrated into the attP2 landing site.                                                                                                                                                  |
| <i>shu</i> <sup>2</sup> mutant mitotic clones were obtained with <i>hsflp</i> <sup>122</sup> ; FRT42D <i>arm-lacZ</i> ;                                                                                                                                                                                                                                        |
| control GLKD was obtained from MTD x <i>w</i> <sup>1118</sup> ;                                                                                                                                                                                                                                                                                                |
| <i>GFP</i> , <i>armi</i> , <i>zuc</i> , <i>piwi</i> , <i>vret</i> , <i>SoYb/BoYb</i> , <i>vas</i> , <i>spn-E</i> , <i>krimp</i> , <i>aub</i> and <i>AGO3</i> GLKDs were obtained from MTD-GAL4 and the respective shRNAs. <i>shu</i> GLKD was obtained from UAS- <i>Dcr-2</i> ; NGT; P{GAL4::VP16- <i>nos</i> .UTR}CG6325 <sup>MVD1</sup> and <i>shu</i> RNAi. |
| GLKDs of <i>shu</i> and <i>armi</i> for Fig. 1 were obtained with UAS- <i>Dcr-2</i> ; NGT; nosGAL4 and the respective VDRC lines.                                                                                                                                                                                                                              |
| All flies were aged 5 days at 25°C before analysis.                                                                                                                                                                                                                                                                                                            |

**Table S5 (oligos used for shRNA cloning)**

| GENE         | Primer              | Sequence                                                                |
|--------------|---------------------|-------------------------------------------------------------------------|
| <i>vas</i>   | <i>vas_top</i>      | ctagcagtAGCGATGTTCCACAACCTATAtagttatattcaagcataTATAGGTTGTGGAACATCGCTgcg |
|              | <i>vas_bottom</i>   | aatcgcAGCGATGTTCCACAACCTATAtatgcttgaatataactaTATAGGTTGTGGAACATCGCTactg  |
| <i>krimp</i> | <i>krimp_top</i>    | ctagcagtCAGATTGGGAGACTACGAATAtagttatattcaagcataTATTCGTAGTCTCCCAATCTGgcg |
|              | <i>krimp_bottom</i> | aatcgcCAGATTGGGAGACTACGAATAtatgcttgaatataactaTATTCGTAGTCTCCCAATCTGactg  |
| <i>AGO3</i>  | <i>AGO3_top</i>     | ctagcagtCTGGTTGATCTTTATCAGCAAtagttatattcaagcataTTGCTGATAAAGATCAACCAgcg  |
|              | <i>AGO3_bottom</i>  | aatcgcCTGGTTGATCTTTATCAGCAAtatgcttgaatataactaTTGCTGATAAAGATCAACCAgactg  |

**Table S6 (used siRNAs for RNAi in OSCs)**

| <b>GENE</b>    | <b>siRNA</b>      | <b>Sequence</b>       |
|----------------|-------------------|-----------------------|
| eGFP           | eGFP_guide        | ACUUCAGGGUCAGCUUGCCTT |
|                | eGFP_passenger    | GGCAAGCUGACCCUGAAGUTT |
| <i>fs(1)Yb</i> | Fs(1)Yb_guide     | UUGAAGAUCUUAUCGCAGCTT |
|                | Fs(1)Yb_passenger | GCUGCGAUAGAUCUUCAATT  |
| <i>Armi</i>    | Armi_guide        | UAAACUUAGCUUGACAGCGTT |
|                | Armi_passenger    | CGCUGUCAAGCUAAGUUUATT |
| <i>Vret</i>    | Vret1_guide       | UUGUAGAGCACAAUUUGUCTT |
|                | Vret1_passenger   | GACAAAUUGUGUCUCAATT   |
|                | Vret2_guide       | UUCUUGAUUAUUAUCCACGTT |
|                | Vret2_passenger   | CGUGGAUAAUAUCAAGGAATT |
| <i>Shu</i>     | Shu1_guide        | UAGUCGCUGUCGCUGUCGCTT |
|                | Shu1_passenger    | GCGACAGCGACAGCGACUATT |
|                | Shu2_guide        | UUCGCAUCUCCUAUGAGCGTT |
|                | Shu2_passenger    | CGCUCAUAGGAGAUGCGAATT |
| <i>Piwi</i>    | Piwi_passenger    | CACCUUCACGCCUGGGAGCTT |
|                | Piwi_guide        | GCUCCCAGGCGUGAAGGUGTT |
| <i>Zuc</i>     | Zuc_passenger     | UUGUUGUGCAUCAAGUUCGTT |
|                | Zuc_guide         | CGAACUUGAUGCACAACAATT |
| <i>Krimp</i>   | Krimp_guide       | UAUAUAUUCCAAUCGUCCTT  |
|                | Krimp_passenger   | GGACGAUUGGAAAUAUAUATT |

**Table S7 (primers for QPCR analysis)**

| <b>GENE</b>        | <b>Primer</b> | <b>Sequence</b>          |
|--------------------|---------------|--------------------------|
| <i>rp49</i>        | rp49_fwd      | CCGCTTCAAGGGACAGTATCTG   |
|                    | rp49_rev      | ATCTCGCCGAGTAAACGC       |
| <i>ZAM</i>         | ZAM_fwd       | ACTTGACCTGGATACACTCACAAC |
|                    | ZAM_rev       | GAGTATTACGGCGACTAGGGATAC |
| <i>HeT-A</i>       | HeT-A_fwd     | CGCGCGGAACCCATCTTCAGA    |
|                    | HeT-A_rev     | CGCCGCAGTCGTTTGGTGAGT    |
| <i>blood</i>       | blood_fwd     | AACAATAGAAAGAAGCCACCGAAC |
|                    | blood_rev     | AGTCATGGACTATTGAGGGTGTG  |
| <i>FLAG HA tag</i> | TAG_fwd       | GCCGCATCTTTTACCCATACGA   |
|                    | TAG_rev       | GAGCAGCGTAATCTGGAACGTCA  |
